# Supplementary material
Source: Elsevier journal article supplement (https://www.sciencedirect.com/science/article/pii/S0014256521002563)

## Material adicional del 21-00219

Figura S1. Porcentaje de acuerdo en los enunciados del Delphi (N = 291)

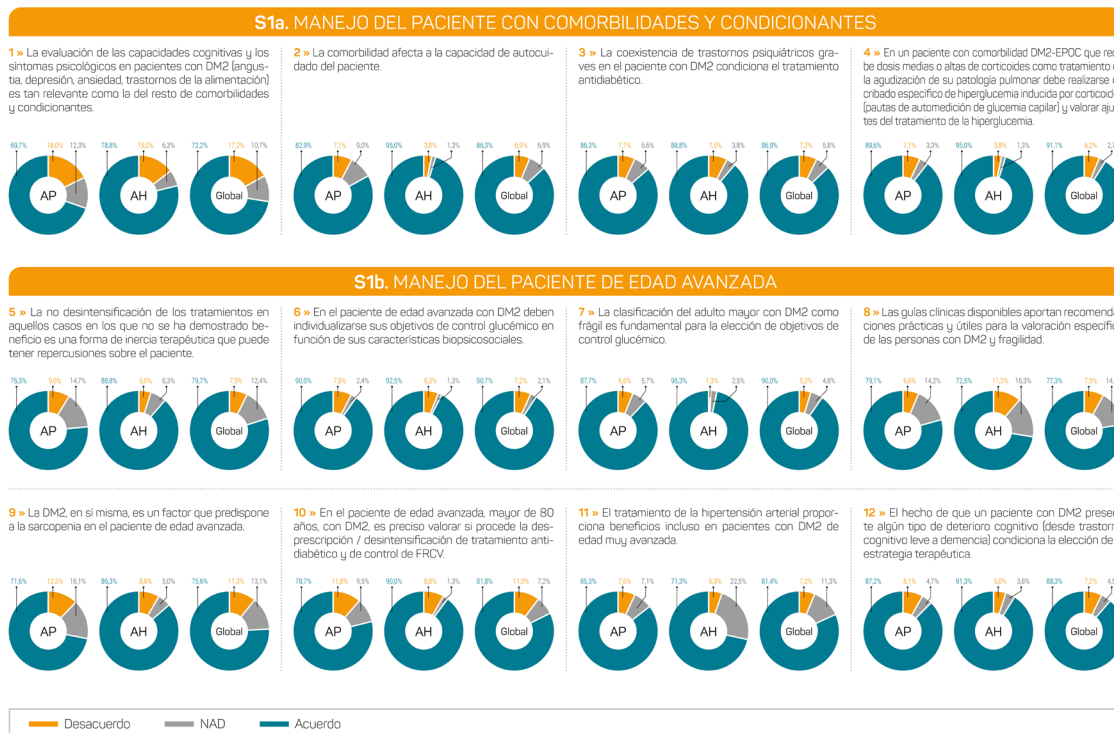

Figura S2. Preguntas OAC sobre desintensificación del tratamiento antidiabético (N = 296)

**S2.** ¿Qué situaciones considera que pueden ser motivo de desintensificación de tratamientos antidiabéticos una vez evaluados los riesgos-beneficios?

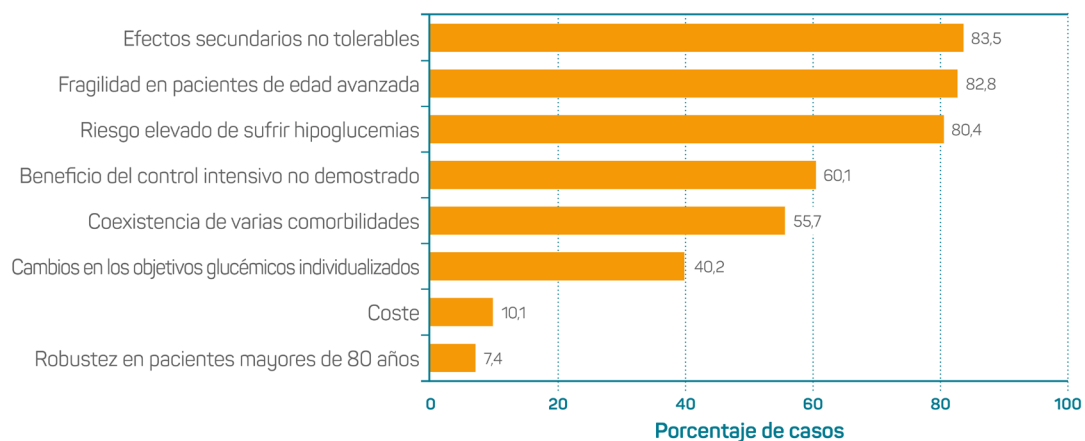

Figura S3. Pregunta OAC sobre la definición del paciente mayor y frágil (N = 296)

### S3. ¿Qué factores definen un paciente de edad avanzada como frágil?

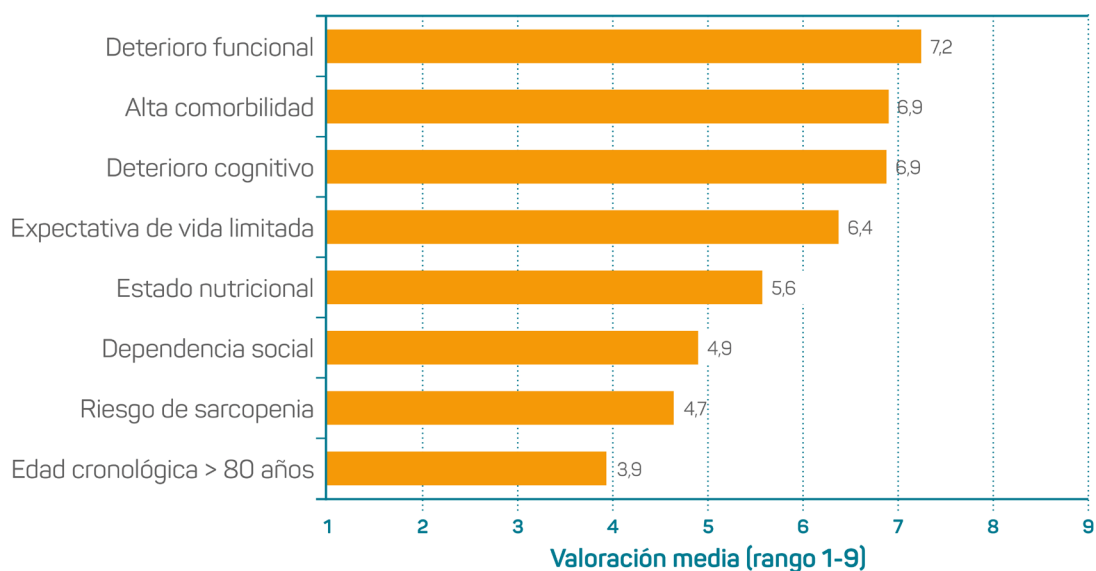

Figura S4. Pregunta OAC sobre las herramientas de valoración de la fragilidad y sarcopenia (N =296)

**S4a.** En su práctica habitual, ¿conoce y utiliza alguna de las siguientes pruebas o test para valorar la fragilidad?

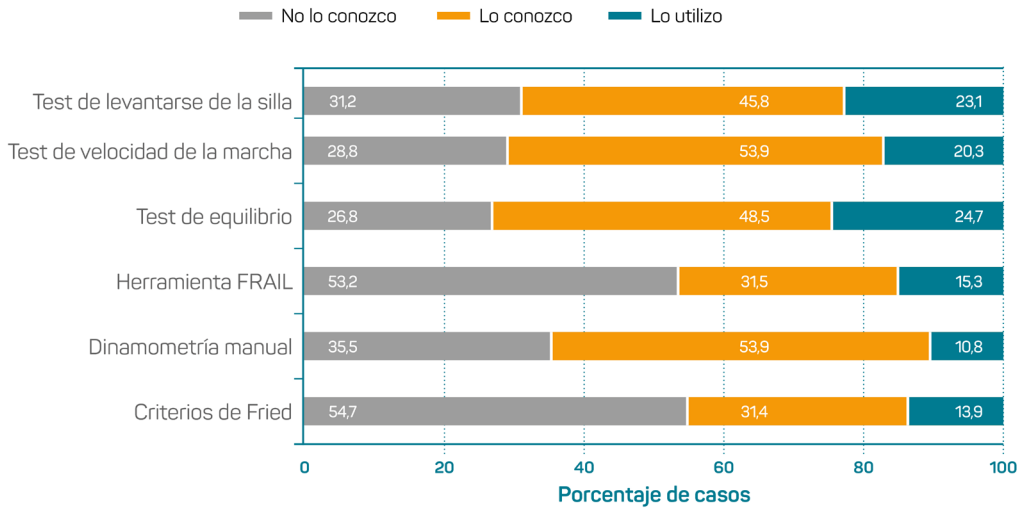

**S4b.** En su práctica habitual, ¿conoce y utiliza alguna de las siguientes pruebas o test para valorar la sarcopenia?

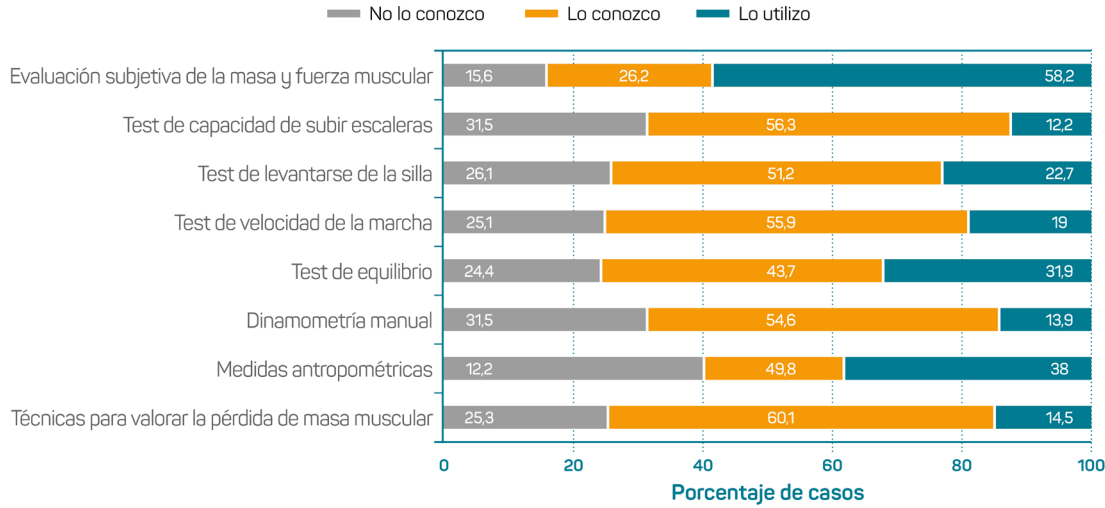

Supplement: mmc1 [file S0014256521002563:mmc1.pdf]
